# Supplementary material for: Echolocation reverses information flow in a cortical vocalization network
Source: Research Square preprint supplement (doi:10.21203/rs.3.rs-536987/v1), 2021-05-26
Supplement: Supplementary file 1 [file 2e903b9ca264e40b388a443d.pdf]

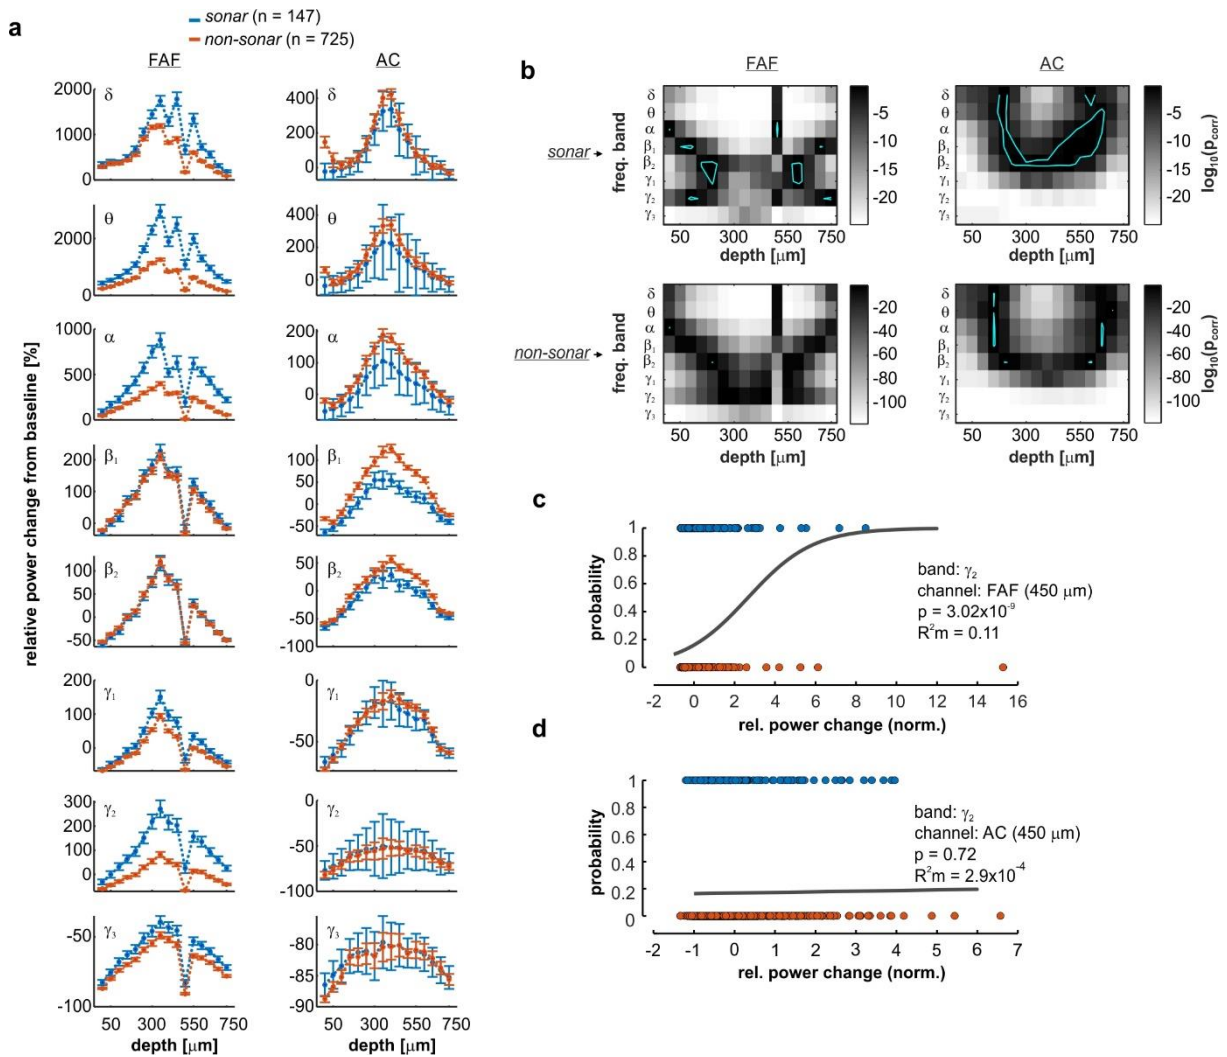

**Fig. S1. Pre-vocal power changes associated with the production of sonar and non-sonar calls.** (a) Percentage pre-vocal power change across LFP frequency bands (d, 1-4 Hz; q, 4-8 Hz; a, 8-12 Hz;  $\beta_1$ , 12-20 Hz;  $\beta_2$ , 20-30 Hz;  $\gamma_1$ , 30-60 Hz;  $\gamma_2$ , 60-120 Hz;  $\gamma_3$ , 120-200 Hz), relative to a no-voc baseline, across all cortical depths in FAF (left) and AC (right). Pre-vocal power change values related to sonar utterances (n = 147) are depicted in blue; those related to non-sonar utterances (n = 725) are depicted in orange. Data shown as mean  $\pm$  sem. (b) Significance matrices depicting p-values statistical tests to determine whether changes shown in panel a were significant (i.e. significantly different than 0% change for each channel and frequency band; FDR-corrected Wilcoxon signed rank tests). The colour scale in the figures indicates the  $\log_{10}$  of the corrected p-values (significance when  $p_{\text{corr}} < 0.05$ ). (c) Example GLM fitted with pre-vocal power change data from an FAF channel located at 450  $\mu\text{m}$  from the cortical surface, in the  $\gamma_2$ -band. Power changes in this band significantly predicted ensuing call type on a trial-by-trial basis ( $p = 3.02 \times 10^{-9}$ ), with moderate effect size  $R^2_{\text{m}} = 0.11$ . (d) Example GLM fitted with pre-vocal power change data from the AC, same electrode depth as in c, and also in the  $\gamma_2$  frequency band. Relative power changes in this frequency band and brain region did not significantly predict ensuing vocal type ( $p = 0.72$ ).



were performed for cycle parameter values (see Methods). **(b)** Effect sizes (Cohen's  $d$ ) of the channel-by-channel pairwise comparisons between cycle parameters, across penetrations and frequency bands. Bands shown are those that were differentially modulated in terms of pre-vocal power between sonar and non-sonar utterances in FAF and AC ( $d$ ,  $q$ ,  $a$ ,  $b_1$ ,  $g_2$ ). In each plot, a pixel with index  $(i, j)$  depicts the  $d$  obtained from comparing channels  $i$  and  $j$  (solid black lines in the plots divide channels from frontal and auditory regions). Channels with number 1-16 are located in FAF; channels with number 17-32 are in AC (see **Fig. 1e**).  $d$  values are only shown if the statistical comparisons for a given parameter are significant (FDR-corrected Wilcoxon signed rank tests,  $p_{\text{corr}} < 0.05$ ); the value was set to 0 otherwise ( $p_{\text{corr}} \geq 0.05$ ). Large effect sizes occur for  $|d| > 0.8$  (notably, blue and red regions in the plots).

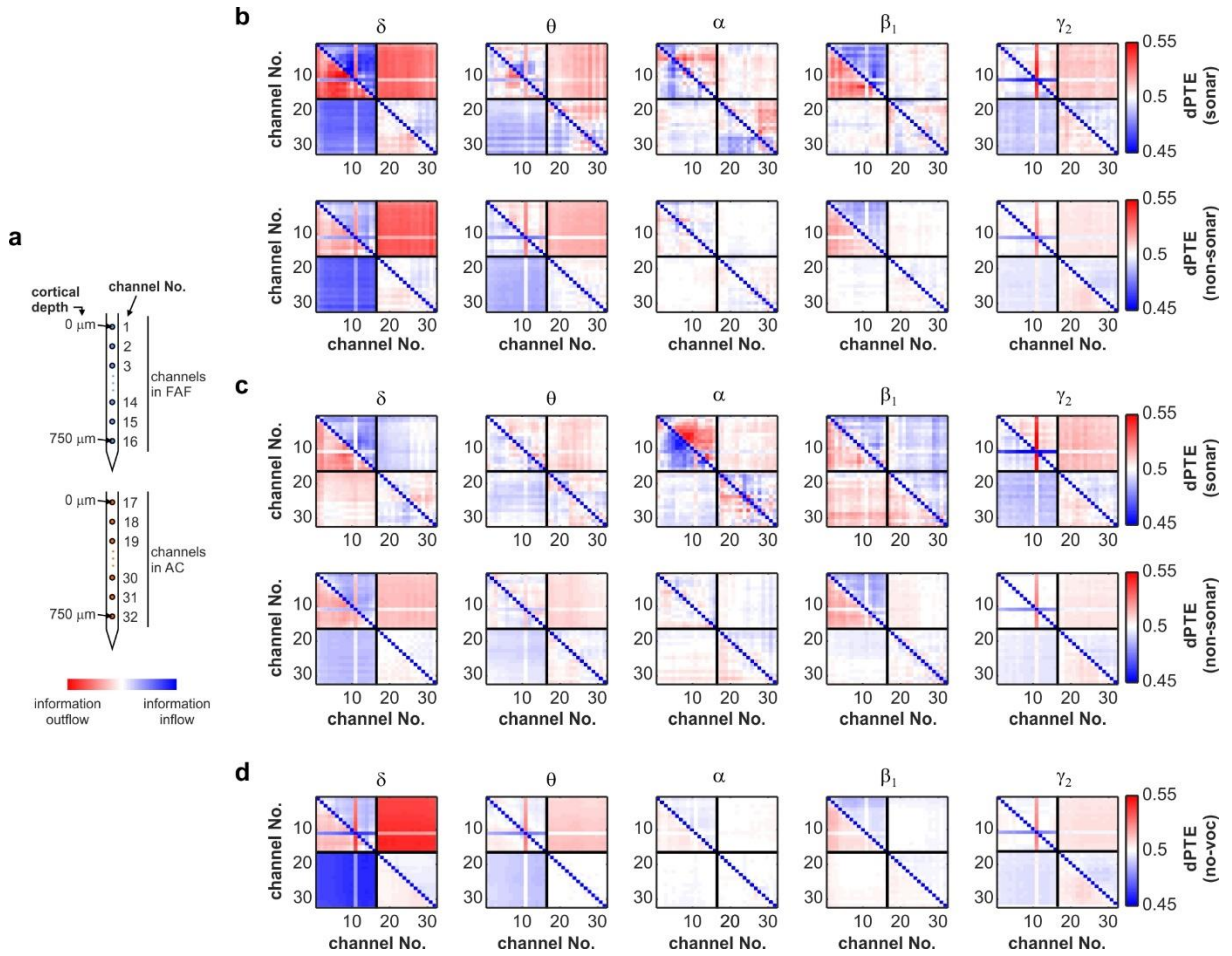

**Fig. S3. Average dPTE matrices during pre-vocal, post-vocal, and no-voc periods. (a)**

Schematic representation of channel depth and cortical region associated with channel numbers in the panel. **(b)** Mean pre-vocal directed phase transfer entropy (dPTE) across LFP frequency bands ( $\delta$ ,  $\theta$ ,  $\alpha$ ,  $\beta_1$ ,  $\gamma_2$ ) and conditions (sonar utterance, top; non-sonar utterance, bottom); 500 repetitions each). **(c)** Same as in **b**, with dPTE data corresponding to post-vocal periods. **(d)** Similar to **b** and **c**, illustrating average dPTE matrices corresponding to no-voc periods. Each matrix in the figure (i.e. panels **b-d**) illustrates the average dPTE across 500 repetitions calculated using 50 trials corresponding to sonar, non-sonar (both pre- and post-vocal), or no-voc related LFP segments. A cell  $(i, j)$  in a matrix shows the average dPTE value related to the information flow between channels  $i$  and  $j$ , which occurs in the  $i \rightarrow j$  direction for dPTE values  $> 0.5$  (red colours), and in the  $j \rightarrow i$  direction for dPTE values  $< 0.5$  (blue colours).
